# Supplementary material for: Generalist Eimeria species in rodents: Multilocus analyses indicate inadequate resolution of established markers
Source: PubMed Central journal article supplement (PMC7029063; doi:10.1002/ece3.5992), 2020-01-11

- Coding sequence (CDS)
- tRNA
- rRNA
- Primer position

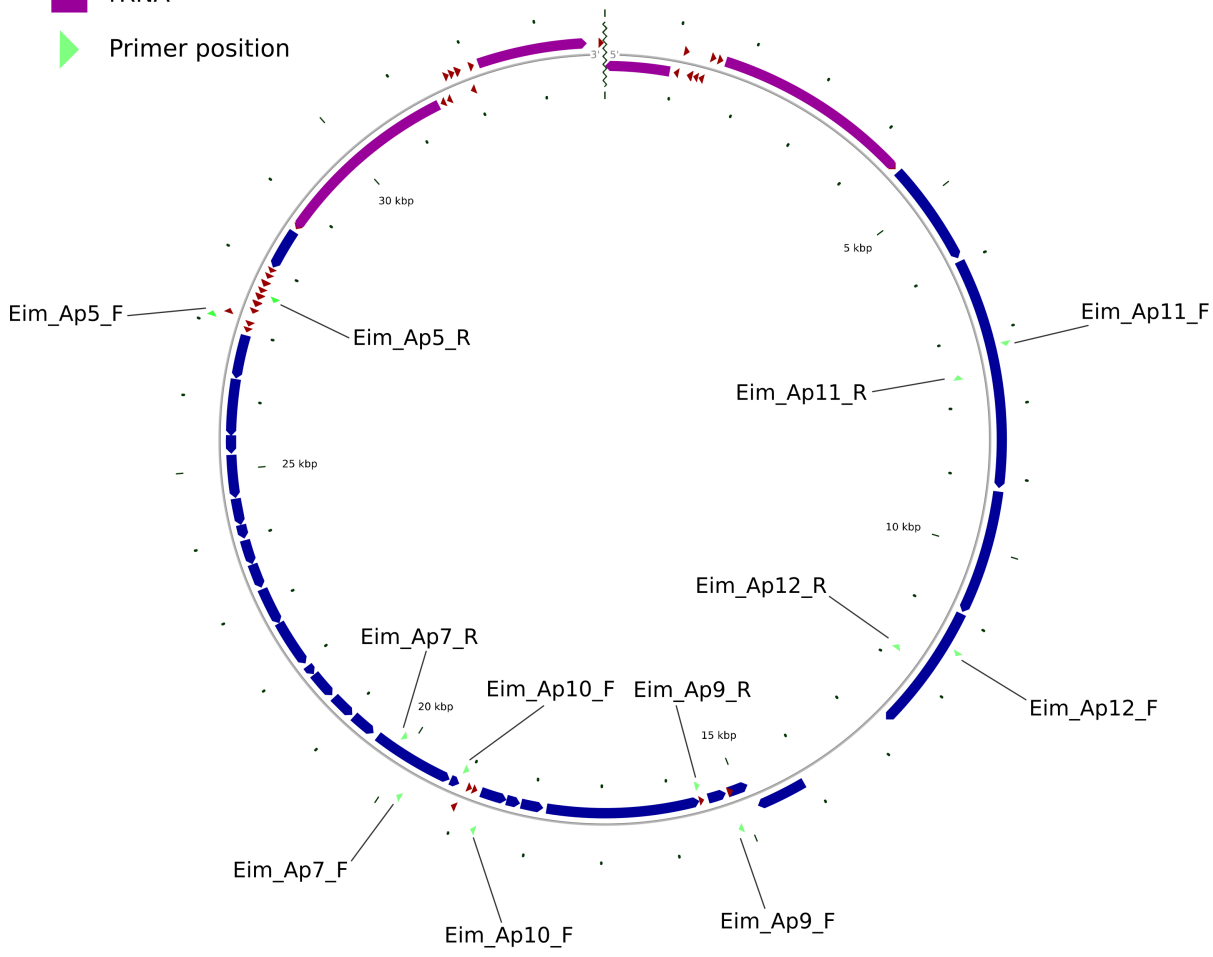

Supplement: ECE3-10-1378-s005.pdf [file ECE3-10-1378-s005.pdf]
