# Supplementary material for: Generalist Eimeria species in rodents: Multilocus analyses indicate inadequate resolution of established markers
Source: PubMed Central journal article supplement (PMC7029063; doi:10.1002/ece3.5992), 2020-01-11

**A)**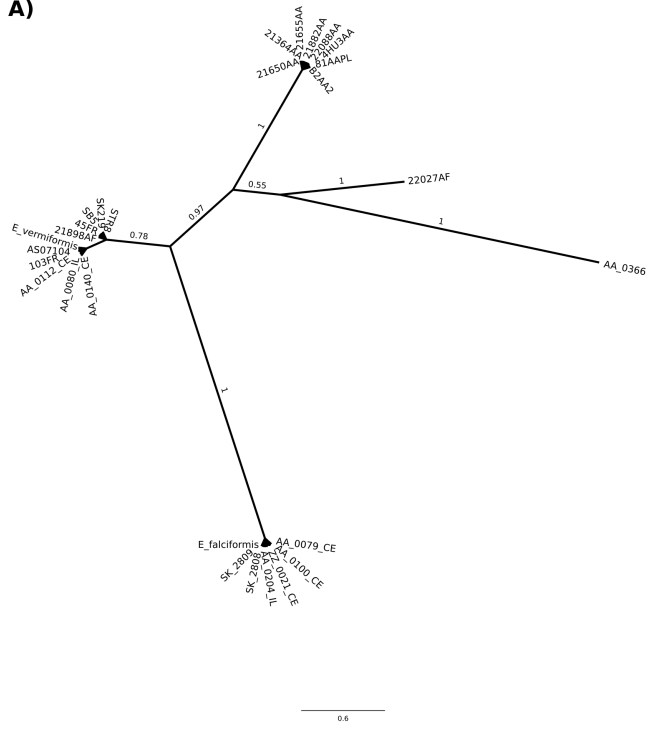**B)**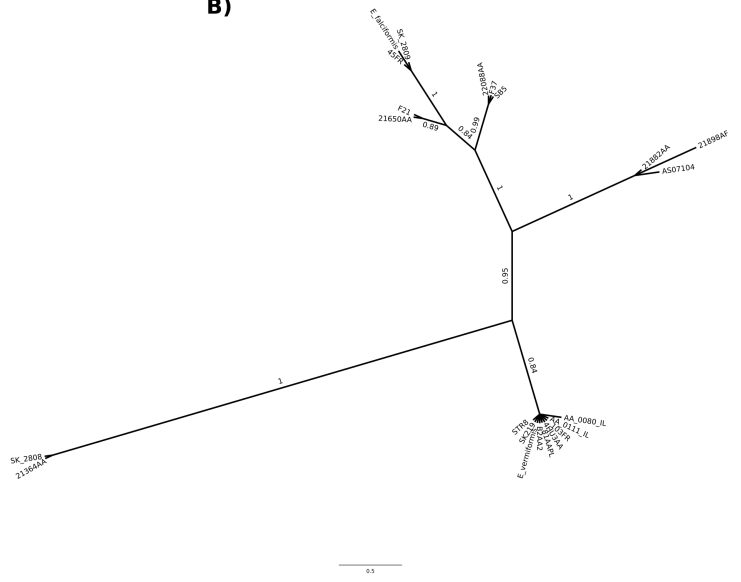**C)**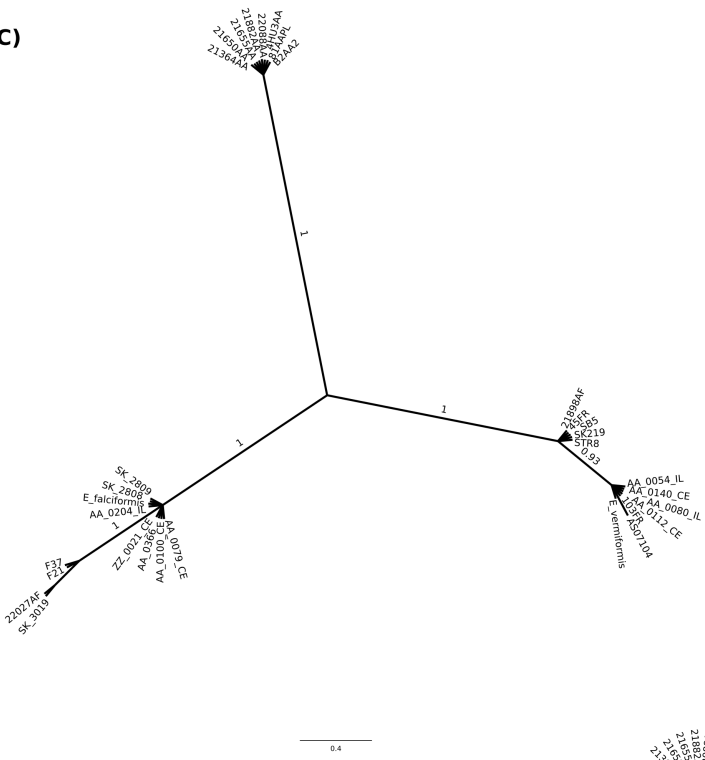**D)**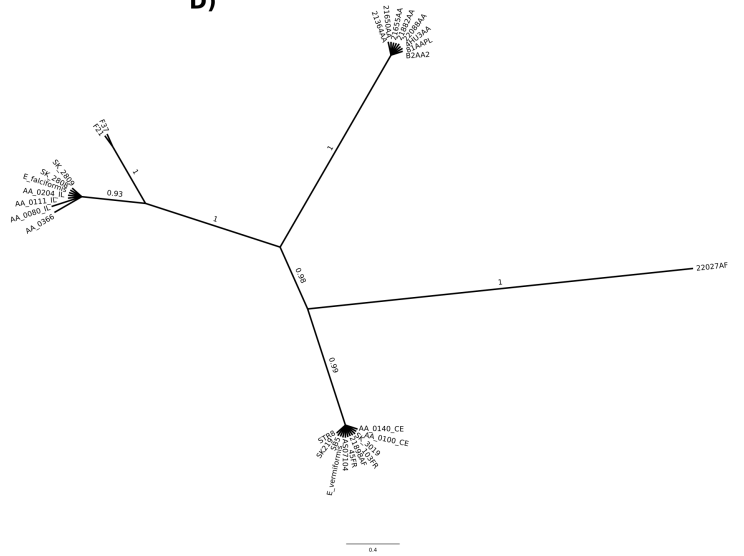**E)**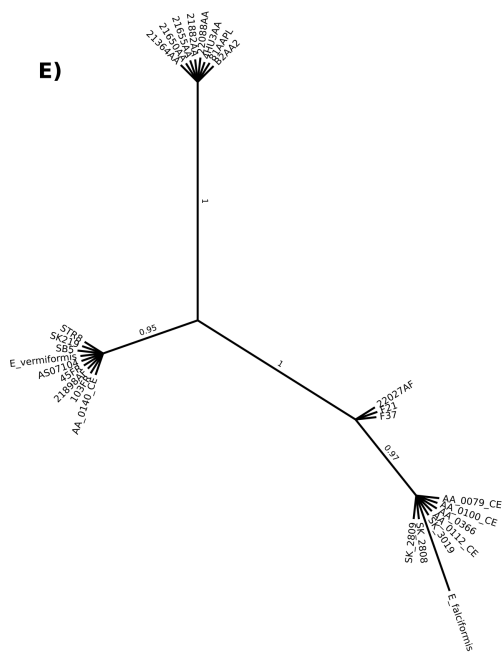

Supplement: ECE3-10-1378-s012.pdf [file ECE3-10-1378-s012.pdf]
